# Supplementary material
Source: publisher site journal article supplement (https://www.dovepress.com/article/209008)
Supplement: Supplementary file 1 [file get_supplementary_file.php]

## Supplementary material

Table SM1. Codes used to identify the target population and variables.

|                                               | ICD-9-CM                                                                           | ICD-10                                                                                       |
|-----------------------------------------------|------------------------------------------------------------------------------------|----------------------------------------------------------------------------------------------|
| Dementia codes                                | 290xx, 2941x; 3310; 3311x;<br>33182                                                | F01.5x; F02.8x; F03.9x; G30.0x;<br>G30.1x; G30.8x; G30.9x; G31.0x;<br>G31.1x; G31.2x; G31.83 |
| Dementia with NPS codes                       | 294.11, 290.11, 290.12, 290.13,<br>290.2x, 290.3, 290.41, 290.42,<br>290.43, 290.9 | F02.81, F03.91, F05                                                                          |
|                                               | ATC classification                                                                 |                                                                                              |
| Specific prescription for Alzheimer's disease | Group N06D                                                                         |                                                                                              |
| Antipsychotic medication                      | Group N05A                                                                         |                                                                                              |
| Antidepressant medication                     | Group N06A                                                                         |                                                                                              |

ICD: International Classification of Diseases. ATC: Anatomical, Therapeutic, Chemical classification system.
